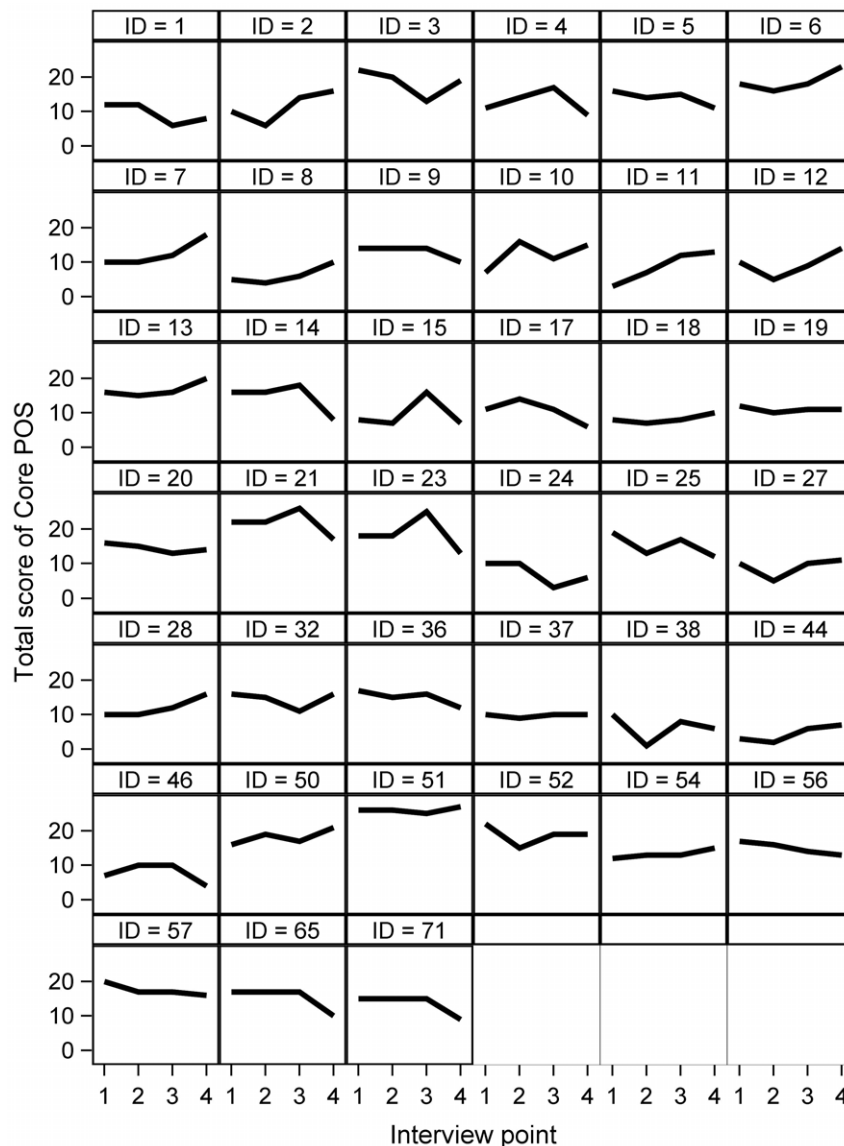

**Figure 1. Individual trajectories of total scores of Palliative care Outcome Scale (POS).** Note: Increased score equals more palliative problems/needs, only patients with 4 assessments plotted.  
doi:10.1371/journal.pone.0046327.g001

depression and/or anxiety. Over a third of the sample overall died during the course of the study, suggesting that we had correctly identified those with late stage disease. Survival was poorer for people with MSA and PSP validating our diagnosis of these patients and pointing to their more urgent needs. MSA and PSP are rarely studied, as is stage 5 IPD which is frequently omitted in clinical studies, thus the survival and symptom data for these groups is especially valuable.

Over the course of one year, half of all patients deteriorated in terms of symptom control and psychological or palliative distress. Analyses of final symptom and quality of life assessments, disappointingly, show that those with initial severe symptoms continued to experience these. The initial scores on the Palliative care Outcome Scale (POS) and the PDQ-8 predicted problems later.

Given the long term nature of the symptoms and the different courses, traditional models of palliative care used in cancer may not be appropriate. However, in the USA a much higher

proportion of non cancer patients are referred to hospice care than in the UK [25], suggesting that here at least solutions have been found for non-cancer patients. Older patients and those from lower socio-economic groups have been shown to miss out on palliative care, with lower levels of health care spending [26]. This would apply to many of those in our study. There are urgent needs to address in the care for people with neurological diseases approaching the end of life, including dementia. The prevalence of these conditions is growing rapidly in our ageing populations. Older people face particular challenges if they are to age and die well in the place and manner of their choosing, especially those who live alone [27], as was the case for 1 in 5 of our sample. Mitchell et al highlight the need to design and test interventions that promote high-quality, goal-directed care [28]. A new short-term model of palliative care integrated with neurology, provided earlier in the course of illness, has been tested in UK patients with Multiple Sclerosis, and appeared to improve symptoms, reduce caregiver burden and reduce costs by preventing hospital

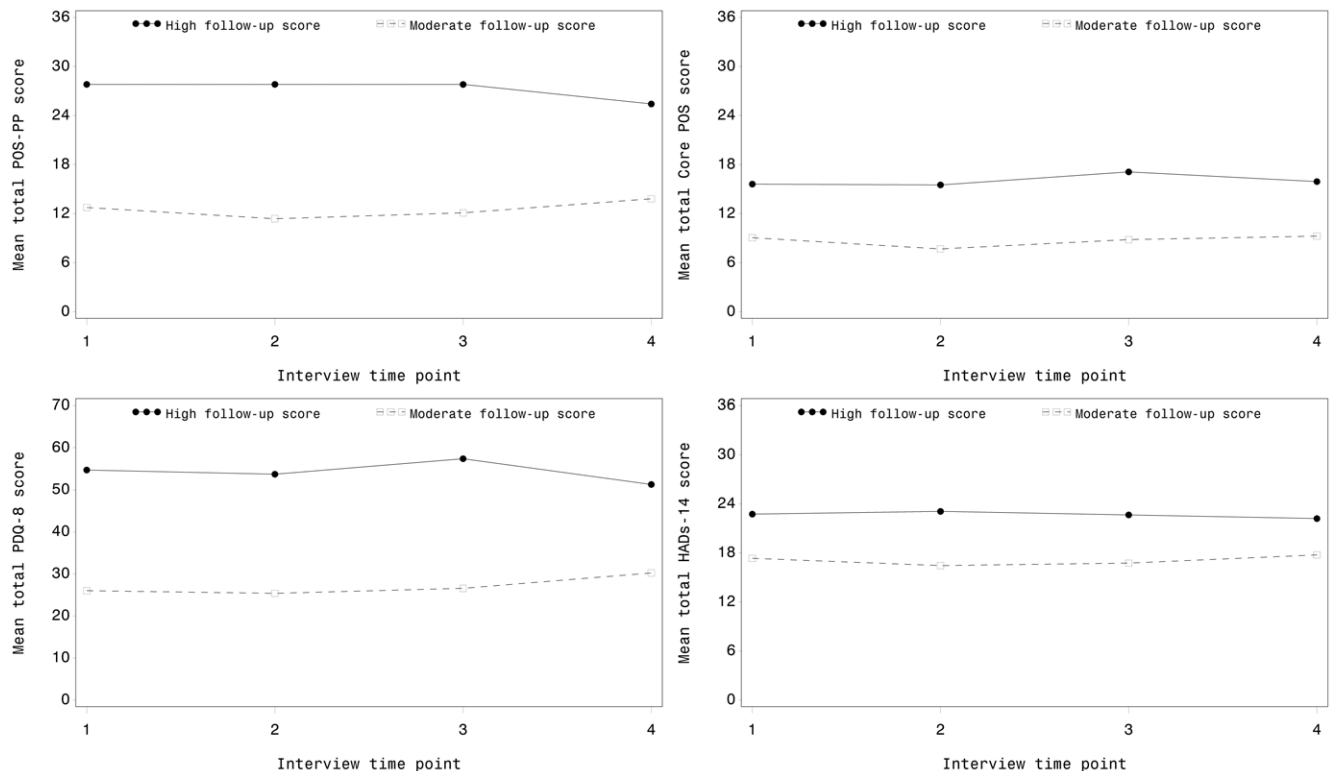

**Figure 2. Mean total score trajectories (POS-PP, POS, PDQ-8 and HADS) by patterns of follow-up scores.**  
doi:10.1371/journal.pone.0046327.g002

admission [29,30]. While neurologists may be reluctant to introduce the term 'Palliative care' to patients, in Germany a recent survey of 573 patients severely affected by multiple sclerosis found that 64% wanted disease progression and death and dying to be addressed by their doctor [31]. Doctors who were retrospectively viewed as avoiding raising critical aspects of the illness were perceived as less empathetic [31]. 'Short term' palliative care could undertake assessment, and address symptoms, psychological needs, end of life decision making and care co-ordination using specialist palliative care staff, integrated with neurology, rehabilitation and primary care teams. The aim would be to quickly resolve problems and discharge patients after 4–6 weeks, providing education and care plans with existing services. For many patients who are deteriorating slowly this might be cost-effective, and prevent depression and subsequent admissions and improve quality of life. Those patients, especially those with multiple complex problems, whose disease is more rapidly progressing (especially those with MSA and PSP), who were approaching death, or who had continuing problems, could go on to receive continuing palliative care in the community or in hospice following existing care models. This patient group has low survival, exemplified by the high death rate in follow-up, which is already a requirement for many palliative care services for referral. Some guidance already exists on the management of common symptoms arising in end stage of neurological diseases, including treatment of breathlessness, death rattle, restlessness, pain, thirst, and depression, along with consideration of difficult decisions e.g. fluid substitution and sedation in the terminal phase [32], and these could be the subject of future research.

Our study is limited by the setting - one secondary and tertiary neurology service in the south of the UK. There may well be patients who have not been referred to neurology services, and/or

who had become too ill to attend for follow-up who were missed from our study. However, using an established neurological centre, with access to neurological tests and examination, including imaging, reduces the chances of misdiagnosis of IPD, MSA and PSP. Our study may be subject to the Hawthorne effect. Ethically the researcher could not observe severe distress and not offer to help in some way. On a few occasions this happened. In addition, many staff knew that patients were being followed and may have modified their practice. Therefore, it is likely that this study underestimates the actual level of problems experienced by patients and families with Parkinson's syndromes in the community. As our level of need was high this is worrying. Although we identified factors that were associated with future events we cannot assume causality. It may be that our predictive factors were associated with other problems which actually caused the subsequent higher levels of symptoms. However, the predictors we identified will be useful to clinicians in identifying those patients who may need greater subsequent support. We excluded patients already in nursing homes, and so our findings can be extrapolated to only home care samples. Our sample size was limited, and attrition was slightly higher than planned, but this was an extremely difficult to reach group requiring home interviews due to the high levels of disability. Very little is known about the progression of advanced, particularly stage 4/5 (Hoehn and Yahr) Parkinson's, MSA and PSP. We believe our study is the first to examine longitudinal trajectories, contrasting patients with late stage IDP, PSP and MSA, and thus provides a unique contribution, highlighting potential service developments and clinical indicators to identify those with greatest future need.



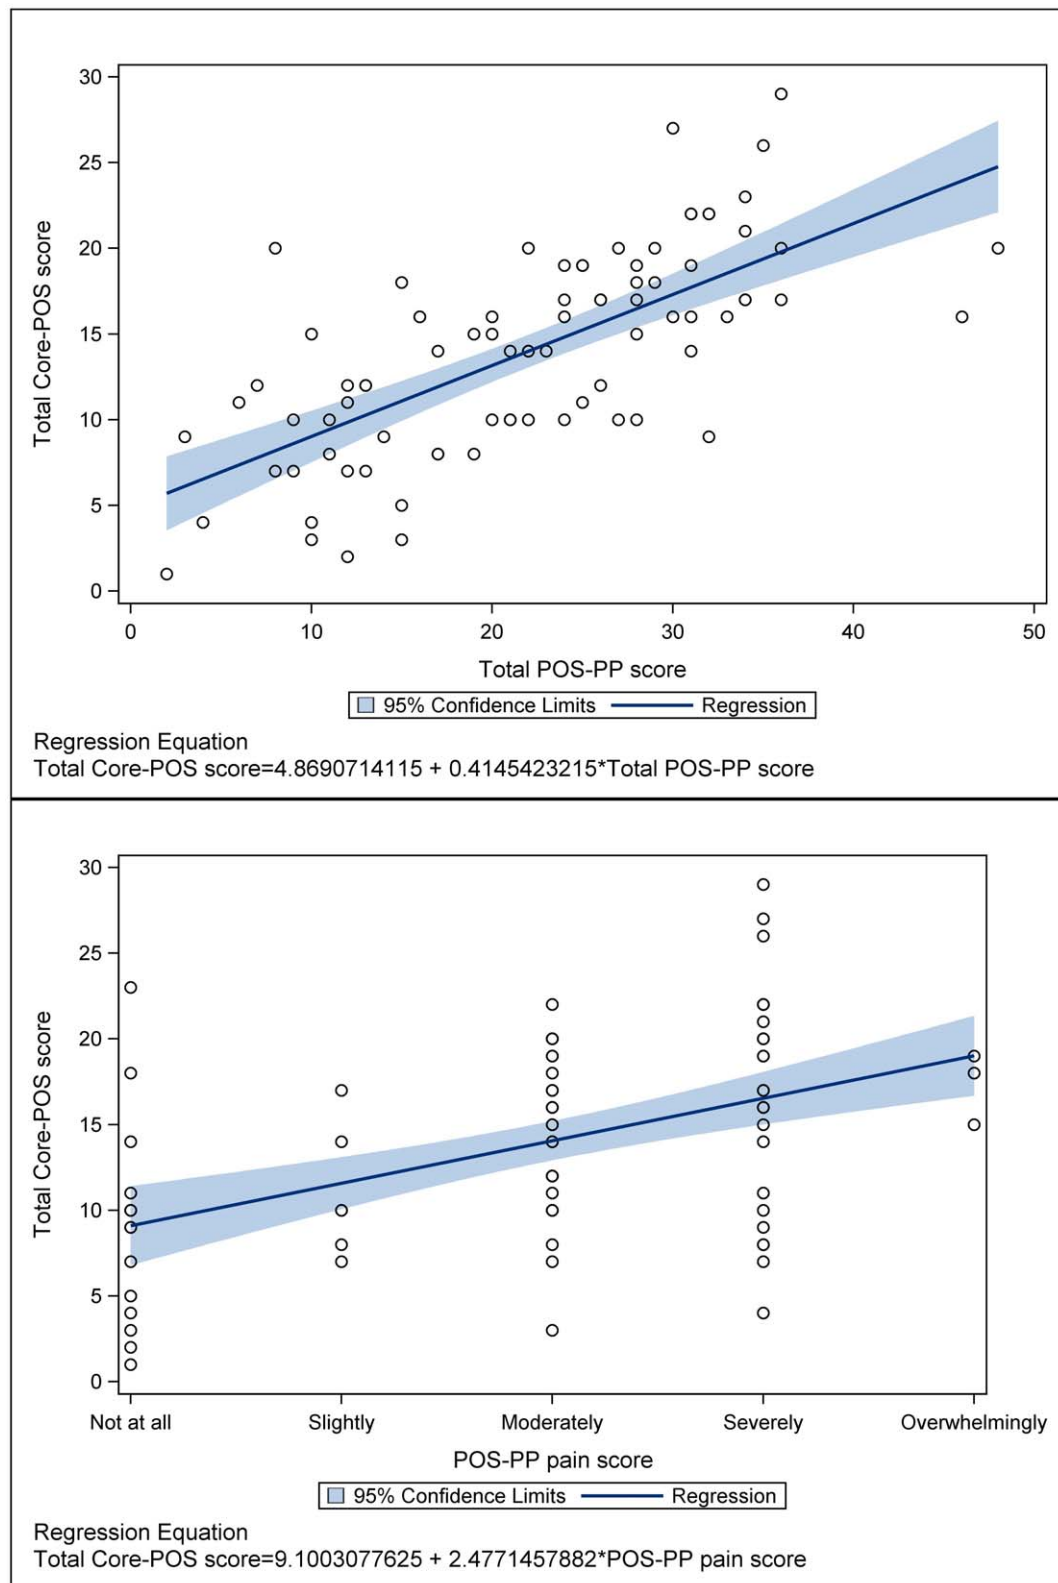

**Figure 3. Relationship between baseline total Core-POS score and final POS-PP total score, Pain score.**  
 doi:10.1371/journal.pone.0046327.g003

## Conclusion

We correctly identified and studied a group of patients with late stage disease missed in earlier research, and were able to study

them over time. Our findings of severe and continuing symptoms, psychological and palliative distress suggest that current care is not meeting patients' needs, or controlling symptoms. The severity of
